# Supplementary material for: Enhancement of functional surface and molecular dynamics at Pt-rGO by spacer 1,6-hexanediamine for precise detection of biomolecules: uric acid as a specimen
Source: Royal Society of Chemistry journal article supplement (doi:10.1039/d3sd00135k), 2023-01-01
Supplement: d3sd00135k1.pdf [file d3sd00135k1.pdf]

## Supporting Information

### Enhancement of Functional Surface and Molecular Dynamics at Pt-rGO by Spacer 1,6-Hexanediamine for Precise Detection of Biomolecules: Uric acid as a Specimen

Mohammad Razaul Karim<sup>a\*</sup>, Mohammad Jayed,<sup>a</sup> Md. Zakariya Rahman Laskar,<sup>a</sup> Md Murshed Bhuyan,<sup>b</sup> Md. Saidul Islam<sup>c</sup>, Shinya Hayami<sup>c</sup>, Mohammed M. Rahman<sup>d</sup>

<sup>a</sup>Department of Chemistry, School of Physical Sciences, Shahjalal University of Science and Technology, Sylhet-3114, Bangladesh

<sup>b</sup>Department Mechanical Engineering, Gachon University, South Korea

<sup>c</sup>Department of Chemistry, GSST, Kumamoto University, Japan.

<sup>d</sup>Department of Chemistry, King Abdulaziz University, Saudi Arabia

Corresponding author: Tel: +8801750200968. E-mail: [krazaul@yahoo.com](mailto:krazaul@yahoo.com)

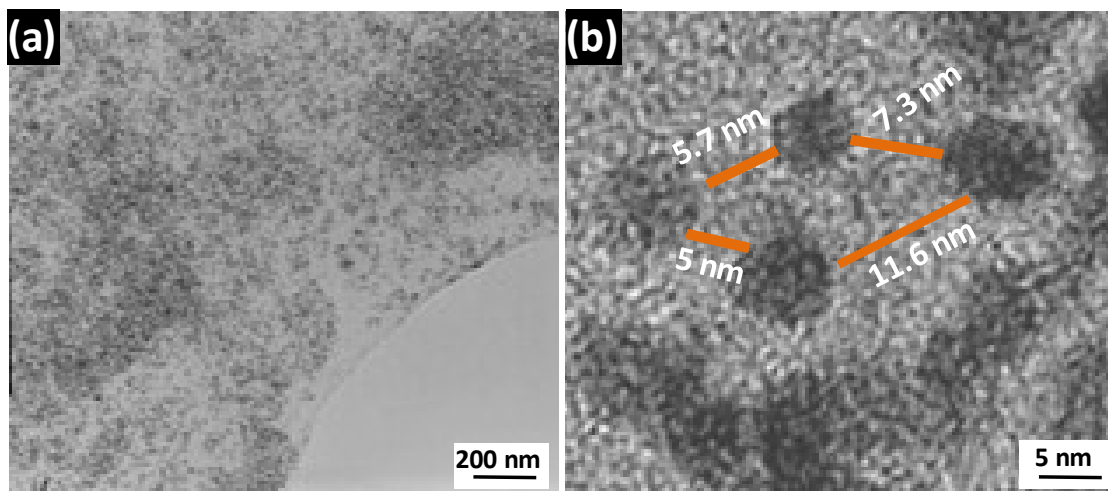

Figure S1: TEM image of HA-rGO-Pt

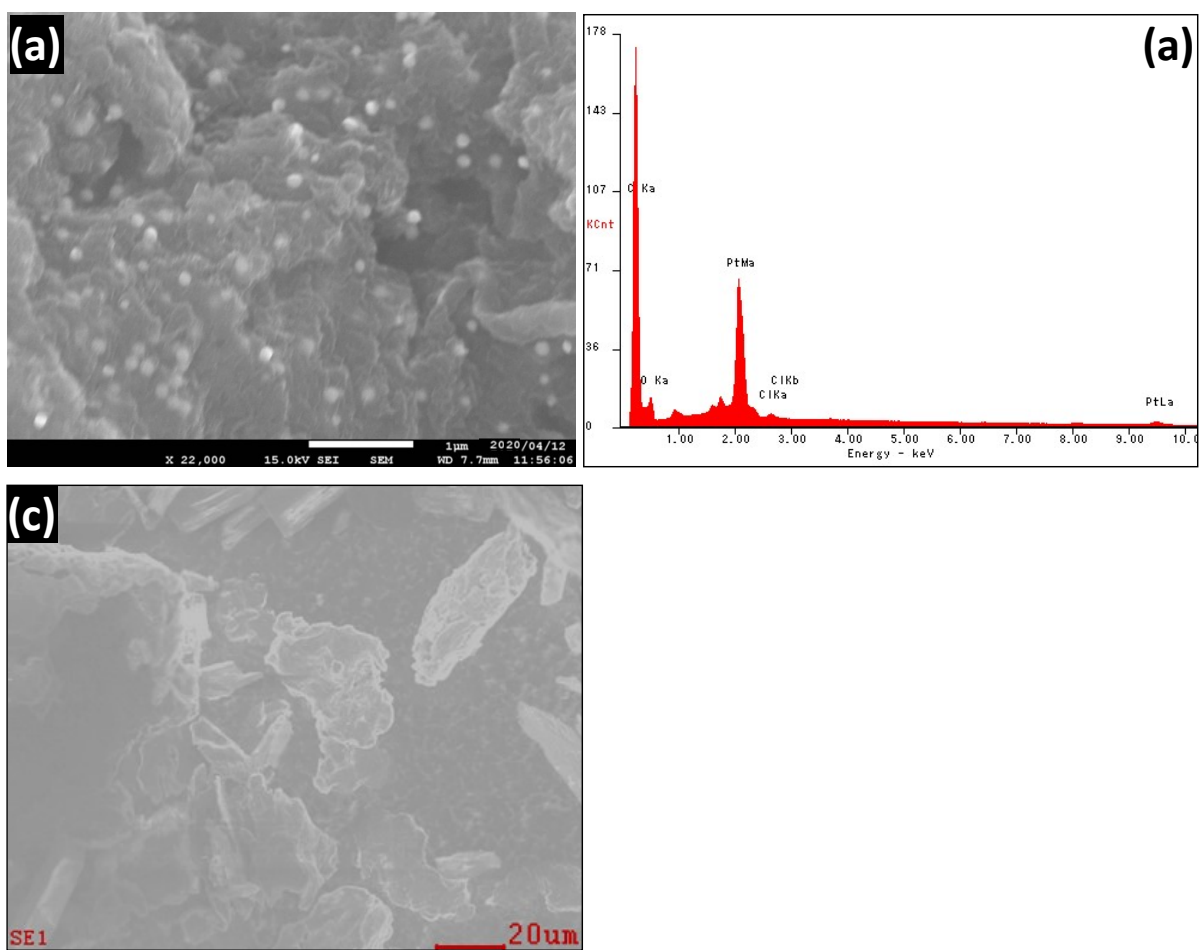

**Figure S2: SEM (a) EDS (b) and EDS mapping area (c) for HA-rGO-Pt**

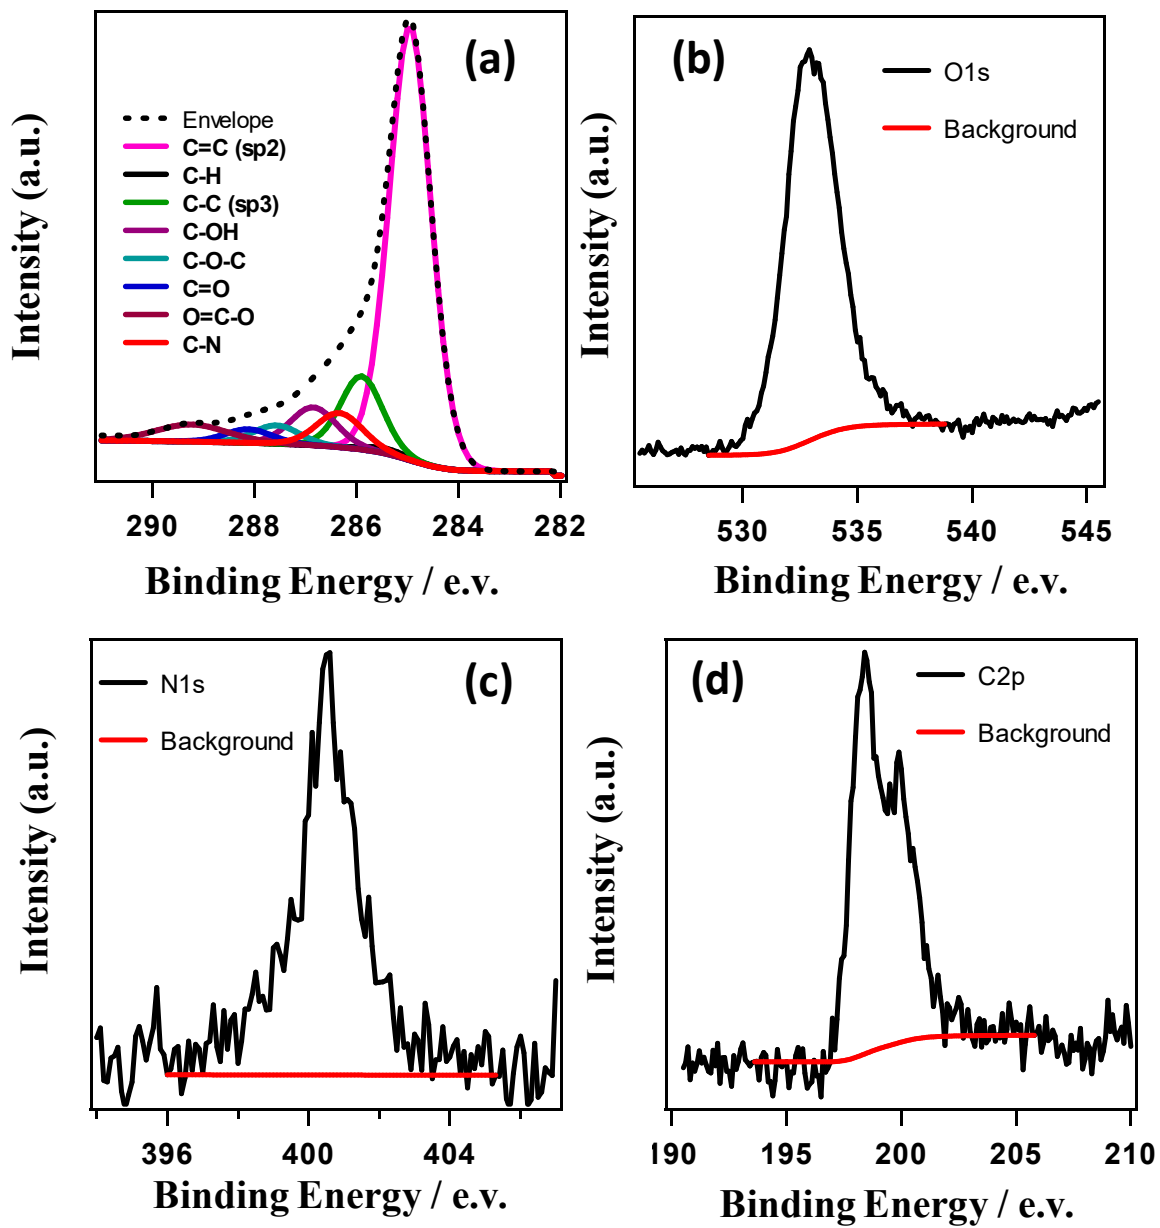

Figure S3: XPS spectra of HA-rGO-Pt. C1s (a) O1s (b) N1s (c) and C2p (d)

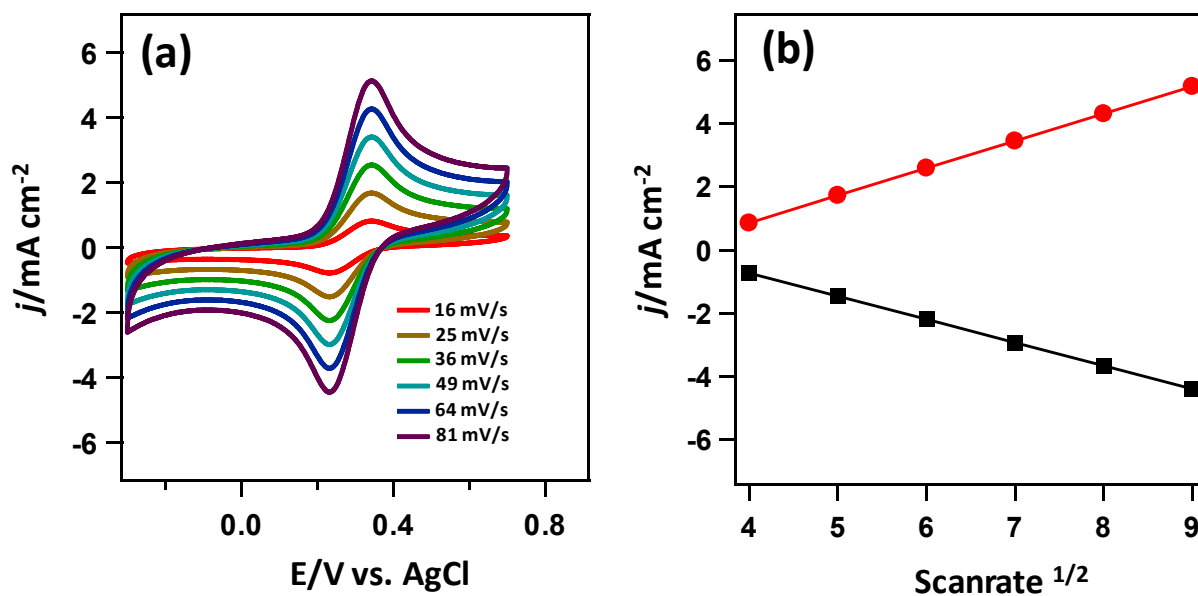

Figure S4: Cyclic voltammograms of 10 mM  $[K_4Fe(CN)_6]/[K_3Fe(CN)_6]$  couple (1:1) with supporting 0.1 M KCl at various scan rat (a), and scan rate dependent peak currents (b).
